# Supplementary material
Source: Springer Nature journal article supplement (https://www.springermedizin.de/resource/supplementary/13041_2013_221_MOESM15_ESM.pdf/25657772)

Motor neuron  
(normal condition)

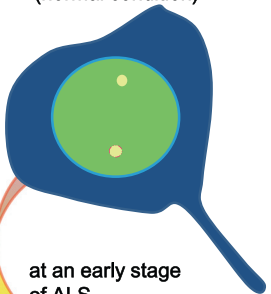

at an early stage  
of ALS

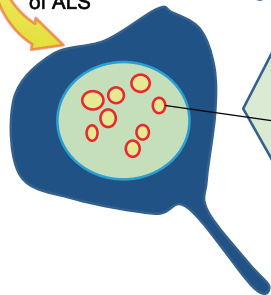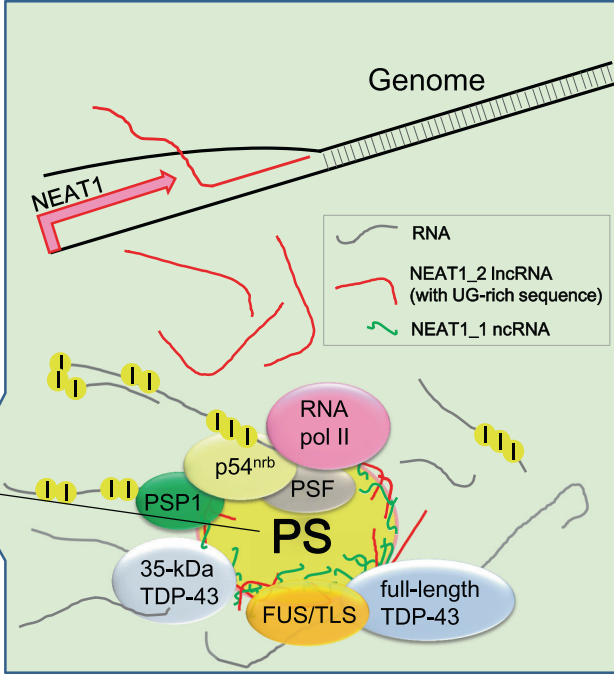

Supplement: MOESM15 [file 25657772]
